# Supplementary material for: Asthma reduces glioma formation by T cell decorin-mediated inhibition of microglia
Source: Nat Commun. 2021 Dec 8;12:7122. doi: 10.1038/s41467-021-27455-6 (PMC8654836; doi:10.1038/s41467-021-27455-6)
Supplement: Supplementary file 4 — Source Data [file 41467_2021_27455_MOESM4_ESM.xlsx]

## Sheet: Fig 1b
WT	PBS	OVA	HDM
0.04222	0.107572	0.138976	0.0787
0.05585		0.10574	0.076698
0.055252	0.098629	0.115087	0.076212
0.04522	0.09274	0.122079	0.087043
0.05351	0.106422	0.130137	0.075166
0.0422	0.0936454	0.112522	0.074804
	0.104231	0.102552	0.07525
	0.0942563		0.068499
	0.091252
	0.098522
	0.0896255
	0.0912526
	0.095552
	0.0901225
Table Analyzed	Data 12
Data sets analyzed	A : WT	B : PBS	C : OVA	D : HDM
ANOVA summary
F	92.27
P value	<0.0001
P value summary	****
Significant diff. among means (P < 0.05)?	Yes
R square	0.9022
Brown-Forsythe test
F (DFn, DFd)	2.669 (3, 30)
P value	0.0655
P value summary	ns
Are SDs significantly different (P < 0.05)?	No
Bartlett's test
Bartlett's statistic (corrected)	7.467
P value	0.0584
P value summary	ns
Are SDs significantly different (P < 0.05)?	No
ANOVA table	SS	DF	MS	F (DFn, DFd)	P value
Treatment (between columns)	0.01745	3	0.005816	F (3, 30) = 92.27	P<0.0001
Residual (within columns)	0.001891	30	6.303e-05
Total	0.01934	33
Data summary
Number of treatments (columns)	4
Number of values (total)	34

## Sheet: Fig 1c
Ki67
WT	PBS	OVA	HDM					Iba1											CD3
0.45222	1.70088	0.7153	0.891168					WT	PBS	OVA	HDM								WT	PBS	OVA	HDM
0.222552	2.53846	0.436681	0.685437					4.2158	7.40122	7.04438	7.1788								0	6	0	9
0.4236	1.23747	0.631955	1.12374					2.6417	11.8368	6.6642	8.42703								1	7	1	6
0.22548	1.69315	0.350877	0.735294					2.00096	8.00096	9.09305	9.57127								0	7	4	2
1.0111	2.85965	0.350877	1.08617					3.95461	8.95461	10.0216	8.72349								0	5	3	5
0.2012	3.89813	0.323625	0.600123					2.23213	7.23213	10.0216	10.0216								2	9	6	5
	3.15851		1.23016					3.30321	9.30321	4.60896	7.8565								1	5	9	9
	2.85354		0.227273					3.71136	9.31899	5.2252	8.39913								1	8	6	5
									8.71136	7.25563	6.8544									6	8	8
Table Analyzed	Data 2										8.78685											5
Data sets analyzed	A-D						Table Analyzed	Data 1											Table Analyzed	Data 1
							Data sets analyzed	A-D											Data sets analyzed	A-D
ANOVA summary
F	24.62						ANOVA summary												ANOVA summary
P value	<0.0001						F	24.41											F	11.1
P value summary	****						P value	<0.0001											P value	<0.0001
Significant diff. among means (P < 0.05)?	Yes						P value summary	****											P value summary	****
R squared	0.7547						Significant diff. among means (P < 0.05)?	Yes											Significant diff. among means (P < 0.05)?	Yes
							R squared	0.7234											R squared	0.5433
Brown-Forsythe test
F (DFn, DFd)	4.676 (3, 24)						Brown-Forsythe test												Brown-Forsythe test
P value	0.0104						F (DFn, DFd)	1.777 (3, 28)											F (DFn, DFd)	3.303 (3, 28)
P value summary	*						P value	0.1744											P value	0.0347
Are SDs significantly different (P < 0.05)?	Yes						P value summary	ns											P value summary	*
							Are SDs significantly different (P < 0.05)?	No											Are SDs significantly different (P < 0.05)?	Yes
Bartlett's test
Bartlett's statistic (corrected)	15.88						Bartlett's test												Bartlett's test
P value	0.0012						Bartlett's statistic (corrected)	5.7											Bartlett's statistic (corrected)	11.55
P value summary	**						P value	0.1272											P value	0.0091
Are SDs significantly different (P < 0.05)?	Yes						P value summary	ns											P value summary	**
							Are SDs significantly different (P < 0.05)?	No											Are SDs significantly different (P < 0.05)?	Yes
ANOVA table	SS	DF	MS	F (DFn, DFd)	P value
Treatment (between columns)	21.24	3	7.078	F (3, 24) = 24.62	P<0.0001		ANOVA table	SS	DF	MS	F (DFn, DFd)	P value							ANOVA table	SS	DF	MS	F (DFn, DFd)	P value
Residual (within columns)	6.901	24	0.2875				Treatment (between columns)	150.5	3	50.15	F (3, 28) = 24.41	P<0.0001							Treatment (between columns)	156	3	52.01	F (3, 28) = 11.10	P<0.0001
Total	28.14	27					Residual (within columns)	57.54	28	2.055									Residual (within columns)	131.2	28	4.685
							Total	208	31										Total	287.2	31
Data summary
Number of treatments (columns)	4						Data summary												Data summary
Number of values (total)	28						Number of treatments (columns)	4											Number of treatments (columns)	4
							Number of values (total)	32											Number of values (total)	32

## Sheet: Fig1 e
WT	PBS	OVA	HDM
0.04222	0.10949	0.065144	0.081949
0.06585	0.102247	0.073203	0.0902247
0.055252	0.097869	0.059583	0.097869
0.05522	0.100709	0.089442	0.0800709
0.04351	0.098895	0.07133	0.098895
0.0522	0.111775	0.0982552	0.08252
	0.12018	0.0991222	0.10222
	0.11949
	0.122247
	0.109787
	0.110709
	0.119889
	0.111775
	0.11018
Table Analyzed	Data 1
Data sets analyzed	A-D
ANOVA summary
F	45.77
P value	<0.0001
P value summary	****
Significant diff. among means (P < 0.05)?	Yes
R squared	0.8207
Brown-Forsythe test
F (DFn, DFd)	1.954 (3, 30)
P value	0.1423
P value summary	ns
Are SDs significantly different (P < 0.05)?	No
Bartlett's test
Bartlett's statistic (corrected)	4.551
P value	0.2078
P value summary	ns
Are SDs significantly different (P < 0.05)?	No
ANOVA table	SS	DF	MS	F (DFn, DFd)	P value
Treatment (between columns)	0.01508	3	0.005028	F (3, 30) = 45.77	P<0.0001
Residual (within columns)	0.003296	30	0.0001099
Total	0.01838	33
Data summary
Number of treatments (columns)	4
Number of values (total)	34

## Sheet: fig 1 f
KI67													Iba1									CD3
WT	PBS	OVA	HDM							WT	PBS	OVA	HDM								WT	PBS	OVA	HDM
0.35222	2.27952	1.11472	1.56							4.90339	12.3599	17.6154	19.7977								2	10	7	8
0.062552	1.61255	0.78125	1.102							4.52482	16.2909	16.0673	20.5657								0	5	3	8
0.6236	2.0202	0.384615	0.4							3.39234	14.6286	17.8565	18.167								1	4	4	10
0.22548	1.6336	0.881834	1.4							6.25055	15.9912	15.0776	17.0134								0	8	2	5
1.0111	1.71974	0.722483	0.85							6.94153	14.8034	17.5859	18.0213								1	5	4	7
0.3012	1.60168	1.17311	1.6							5.31653	16.1569	13.3221	15.0065								2	6	6	4
	1.81217	0.763359	0.6								13.6964	14.062	17.3177								0	5	10
	1.52022	0.662364									15.2222	16.6376	18.2425									9	4
	2.29										15.1414											8
	1.8										19.0142											9
	2.5										18.0133											4
	2.23																					8
Table Analyzed	Data 1																					7
Data sets analyzed	A-D								Table Analyzed	Data 1
									Data sets analyzed	A-D
ANOVA summary																			Table Analyzed	Data 1
F	35.87								ANOVA summary										Data sets analyzed	A-D
P value	<0.0001								F	74.86
P value summary	****								P value	<0.0001									ANOVA summary
Significant diff. among means (P < 0.05)?	Yes								P value summary	****									F	14.68
R squared	0.7653								Significant diff. among means (P < 0.05)?	Yes									P value	<0.0001
									R squared	0.8856									P value summary	****
Brown-Forsythe test																			Significant diff. among means (P < 0.05)?	Yes
F (DFn, DFd)	1.815 (3, 33)								Brown-Forsythe test										R squared	0.5949
P value	0.1637								F (DFn, DFd)	0.2484 (3, 29)
P value summary	ns								P value	0.8618									Brown-Forsythe test
Are SDs significantly different (P < 0.05)?	No								P value summary	ns									F (DFn, DFd)	1.179 (3, 30)
									Are SDs significantly different (P < 0.05)?	No									P value	0.3344
Bartlett's test																			P value summary	ns
Bartlett's statistic (corrected)	2.423								Bartlett's test										Are SDs significantly different (P < 0.05)?	No
P value	0.4894								Bartlett's statistic (corrected)	0.8507
P value summary	ns								P value	0.8373									Bartlett's test
Are SDs significantly different (P < 0.05)?	No								P value summary	ns									Bartlett's statistic (corrected)	5.554
									Are SDs significantly different (P < 0.05)?	No									P value	0.1354
ANOVA table	SS	DF	MS	F (DFn, DFd)	P value														P value summary	ns
Treatment (between columns)	14.17	3	4.723	F (3, 33) = 35.87	P<0.0001				ANOVA table	SS	DF	MS	F (DFn, DFd)	P value					Are SDs significantly different (P < 0.05)?	No
Residual (within columns)	4.345	33	0.1317						Treatment (between columns)	646.5	3	215.5	F (3, 29) = 74.86	P<0.0001
Total	18.51	36							Residual (within columns)	83.48	29	2.879							ANOVA table	SS	DF	MS	F (DFn, DFd)	P value
									Total	730	32								Treatment (between columns)	183.8	3	61.26	F (3, 30) = 14.68	P<0.0001
Data summary																			Residual (within columns)	125.2	30	4.172
Number of treatments (columns)	4								Data summary										Total	308.9	33
Number of values (total)	37								Number of treatments (columns)	4
									Number of values (total)	33									Data summary
																			Number of treatments (columns)	4
																			Number of values (total)	34

## Sheet: Fig 2b
Blood	Optic nerve	Cervical lymph node
0.679213	8.69347	1.5368
0.804931	7.54192	1.33324
0.395551	8.4851	2.99994
1.84093	5.99987	2.66647
1.27937		1.49997
Table Analyzed	Data 1
Data sets analyzed	A-C
ANOVA summary
F	75.16
P value	<0.0001
P value summary	****
Significant diff. among means (P < 0.05)?	Yes
R squared	0.9318
Brown-Forsythe test
F (DFn, DFd)	0.7535 (2, 11)
P value	0.4935
P value summary	ns
Are SDs significantly different (P < 0.05)?	No
Bartlett's test
Bartlett's statistic (corrected)	1.899
P value	0.387
P value summary	ns
Are SDs significantly different (P < 0.05)?	No
ANOVA table	SS	DF	MS	F (DFn, DFd)	P value
Treatment (between columns)	111.5	2	55.77	F (2, 11) = 75.16	P<0.0001
Residual (within columns)	8.162	11	0.742
Total	119.7	13
Data summary
Number of treatments (columns)	3
Number of values (total)	14

## Sheet: Fig 2d
PBS	OVA	HDM
0.727928	0.644775	1.13455
0.953872	0.937485	0.927952
1.24131	0.802107	1.10736
1.07689	0.559367
1.02607
0.791204
1.18273
Table Analyzed	Data 1
Data sets analyzed	A : PBS	B : OVA	C : HDM
ANOVA summary
F	3.901
P value	0.0524
P value summary	ns
Significant diff. among means (P < 0.05)?	No
R square	0.415
Brown-Forsythe test
F (DFn, DFd)	0.6924 (2, 11)
P value	0.5209
P value summary	ns
Are SDs significantly different (P < 0.05)?	No
Bartlett's test
Bartlett's statistic (corrected)
P value
P value summary
Are SDs significantly different (P < 0.05)?
ANOVA table	SS	DF	MS	F (DFn, DFd)	P value
Treatment (between columns)	0.2324	2	0.1162	F (2, 11) = 3.901	P=0.0524
Residual (within columns)	0.3277	11	0.02979
Total	0.5601	13
Data summary
Number of treatments (columns)	3
Number of values (total)	14

## Sheet: Fig 2e
PBS	OVA	HDM
0.761662	0.150818	0.582761
1.28987	0.285365	0.476642
0.636055	0.790525	0.402198
1.31242	0.282414
1.32805
0.812803
0.859147
ANOVA table	SS	DF	MS	F (DFn, DFd)	P value
Treatment (between columns)	1.18	2	0.5902	F (2, 11) = 8.224	P=0.0065
Residual (within columns)	0.7894	11	0.07176
Total	1.97	13
Data summary
Number of treatments (columns)	3
Number of values (total)	14

## Sheet: Fig2f
WT	Nf1OPG
1.21512	4.74397
0.413061	3.22901
1.37182	4.92831
Table Analyzed	Data 1
Column B	Nf1OPG
vs.	vs.
Column A	WT
Unpaired t test
P value	0.0058
P value summary	**
Significantly different (P < 0.05)?	Yes
One- or two-tailed P value?	Two-tailed
t, df	t=5.368, df=4
How big is the difference?
Mean of column A	1
Mean of column B	4.3
Difference between means (B - A) ± SEM	3.300 ± 0.6148
95% confidence interval	1.593 to 5.007
R squared (eta squared)	0.8781
F test to compare variances
F, DFn, Dfd	3.287, 2, 2
P value	0.4665
P value summary	ns
Significantly different (P < 0.05)?	No
Data analyzed
Sample size, column A	3
Sample size, column B	3

## Sheet: Fig 2g
PBS	OVA	HDM
0.727928	0.644775	1.13455
0.953872	0.937485	0.927952
1.24131	0.802107	1.10736
1.07689	0.559367
1.02607
0.791204
1.18273
Table Analyzed	Data 1
Data sets analyzed	A : PBS	B : OVA	C : HDM
ANOVA summary
F	3.901
P value	0.0524
P value summary	ns
Significant diff. among means (P < 0.05)?	No
R square	0.415
Brown-Forsythe test
F (DFn, DFd)	0.6924 (2, 11)
P value	0.5209
P value summary	ns
Are SDs significantly different (P < 0.05)?	No
Bartlett's test
Bartlett's statistic (corrected)
P value
P value summary
Are SDs significantly different (P < 0.05)?
ANOVA table	SS	DF	MS	F (DFn, DFd)	P value
Treatment (between columns)	0.2324	2	0.1162	F (2, 11) = 3.901	P=0.0524
Residual (within columns)	0.3277	11	0.02979
Total	0.5601	13
Data summary
Number of treatments (columns)	3
Number of values (total)	14

## Sheet: Fig 3b
PBS	OVA	HDM
0.752694	0.89733	1.20365
0.924539	1.16889	0.82656
1.46931	0.993186	1.1221
1.13681
0.695761
1.16742
Table Analyzed	Data 1
Data sets analyzed	A : PBS	B : OVA	C : HDM
ANOVA summary
F	0.01495
P value	0.9852
P value summary	ns
Significant diff. among means (P < 0.05)?	No
R square	0.003312
Brown-Forsythe test
F (DFn, DFd)	1.393 (2, 9)
P value	0.2972
P value summary	ns
Are SDs significantly different (P < 0.05)?	No
Bartlett's test
Bartlett's statistic (corrected)
P value
P value summary
Are SDs significantly different (P < 0.05)?
ANOVA table	SS	DF	MS	F (DFn, DFd)	P value
Treatment (between columns)	0.001793	2	0.0008963	F (2, 9) = 0.01495	P=0.9852
Residual (within columns)	0.5395	9	0.05994
Total	0.5413	11
Data summary
Number of treatments (columns)	3
Number of values (total)	12

[truncated: 67 more sheets: Fig 3c, Fig 3e, Fig 3f, Fig 3g, Fig 3h, Fig 3i, Fig 4c, Fig 4d, Fig 4e, Fig 4 f, Fig 5a, Fig 5b, Fig 5c, Fig 5f, Fig 5g, Fig 6a-f, Fig 6h, Fig 6i, Fig 6j, Supplimentary Fig1c …]
